# Supplementary material
Source: PubMed Central journal article supplement (PMC3320184)
Supplement: supp_pp.111.191502_191502Cui_Fig_S1.pdf [file supp_pp.111.191502_191502Cui_Fig_S1.pdf]

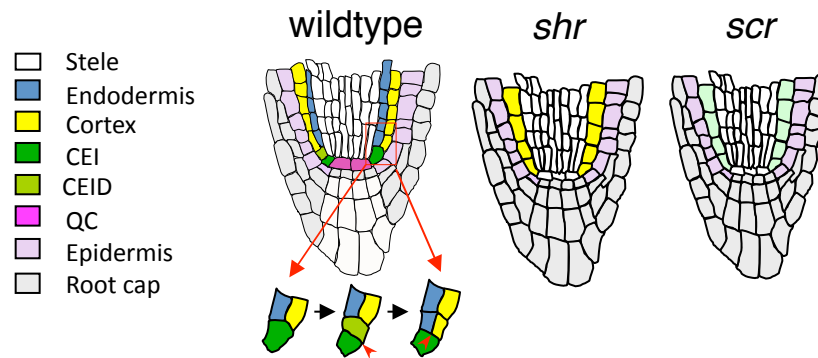

Figure S1. Schematic of the radial pattern in the primary root of wild type, *shr*, and *scr* seedlings of *Arabidopsis* and the asymmetric division of the cortex/endodermis initial cell (CEI) that gives rise to the two layers of ground tissue. QC, quiescent center; CEID, CEI daughter cell. In *shr* the endodermis is lost, whereas in *scr* the mutant ground tissue layer has characteristics of both endodermis and cortex and is therefore colored differently.
