# Supplementary material
Source: PubMed Central journal article supplement (PMC3320184)
Supplement: supp_pp.111.191502_191502Cui_Fig_S2.pdf [file supp_pp.111.191502_191502Cui_Fig_S2.pdf]

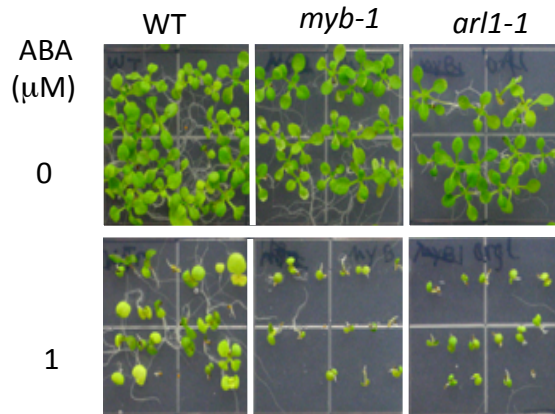

Figure S2. Abscisic acid (ABA) hypersensitivity assay for AT1g68670, a MYB domain transcription factor, and At1g24120, an ARG like protein or ARL1. Both genes have been previously identified as putative targets of SHR (Cui et al., 2011)

FLAG\_532D03 and FLAG\_587G11 are T-DNA insertional lines for AT1g68670 and At1g24120 and are named *myb-1* and *arl1-1* respectively. Shown are seedling grown on normal MS medium (upper row) and MS medium containing 1 μM ABA (lower row), 10 days after germination. WT, wild type.
