# Supplementary material
Source: PubMed Central journal article supplement (PMC3320184)
Supplement: supp_pp.111.191502_191502Cui_Fig_S3.pdf [file supp_pp.111.191502_191502Cui_Fig_S3.pdf]

**A**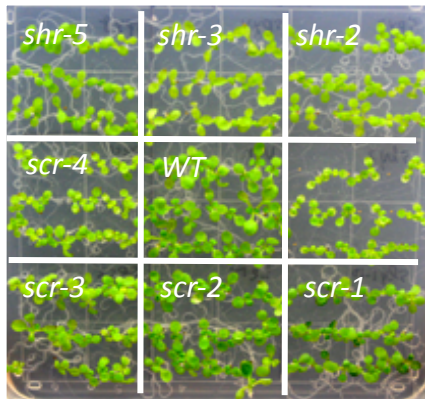**B**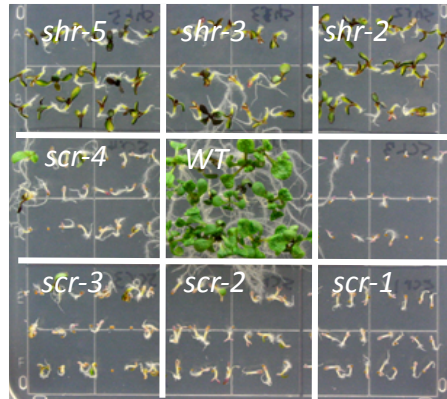

Fig S3. The sugar hypersensitivity in *scr* and *shr* is independent of their genetic backgrounds.

Shown are 10-day-old seedlings of wild type (WT), *shr* and *scr* alleles grown on MS medium (A) or MS medium containing 4% glucose (B).
