# Supplementary material
Source: PubMed Central journal article supplement (PMC3320184)
Supplement: supp_pp.111.191502_191502Cui_Fig_S4.pdf [file supp_pp.111.191502_191502Cui_Fig_S4.pdf]

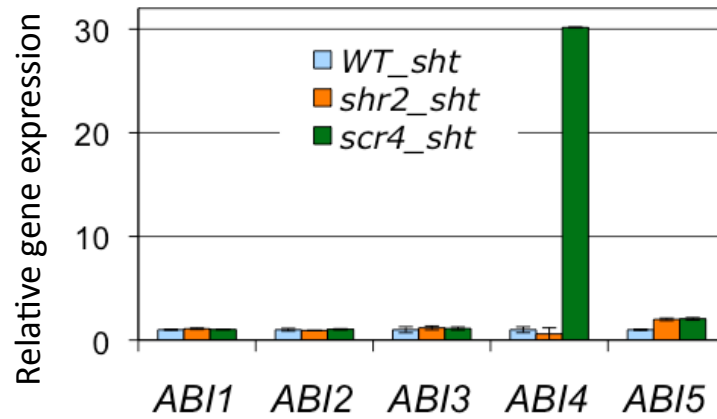

Figure S4. Real-time RT-PCR assay of the transcript levels for *ABI* genes in the shoots of one-week-old wild type (WT), *shr*, and *scr* seedlings. The error bars represent standard deviation from technical replicates.
