# Supplementary material
Source: PubMed Central journal article supplement (PMC3320184)
Supplement: supp_pp.111.191502_191502Cui_Fig_S5.pdf [file supp_pp.111.191502_191502Cui_Fig_S5.pdf]

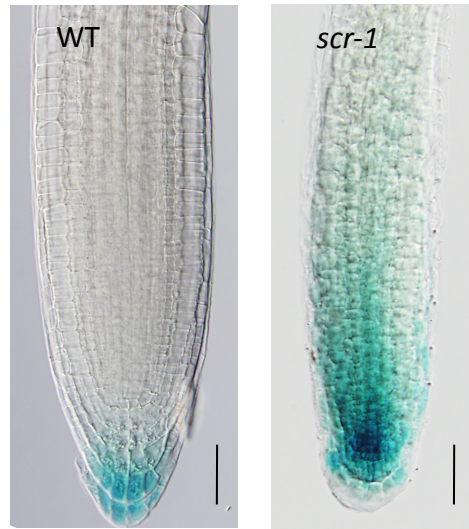

Figure S5. *pABI4::GUS* expression pattern in wild type (WT) and *scr-1*, seven days after germination. Bars = 50  $\mu$ m.
